# Supplementary material for: The role of site-directed point mutations in protein misfolding
Source: Royal Society of Chemistry journal article supplement (doi:10.1039/c3cp55367a), 2014-01-01
Supplement: c3cp55367a1.pdf [file c3cp55367a1.pdf]

## Figure S1

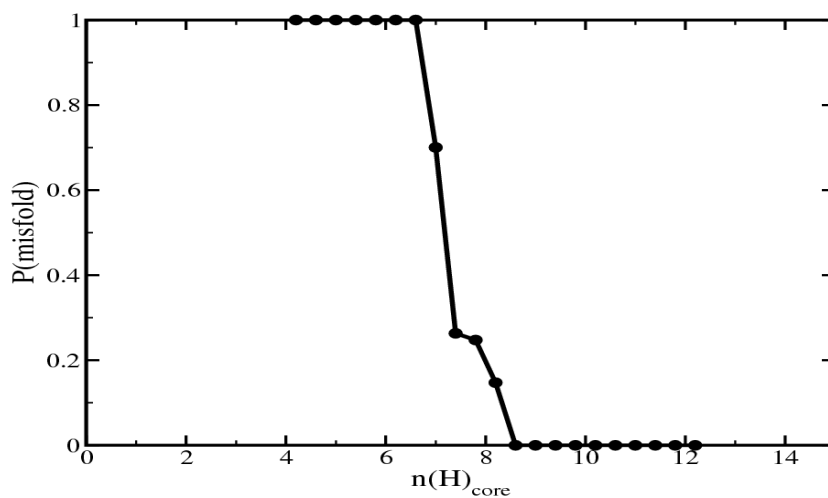

Figure S1. Probability of misfolding ( $P(\text{misfold})$ ) of the mutated sequences is plotted against  $nH_{core}$  for protein 2PM1.

## Figure S2

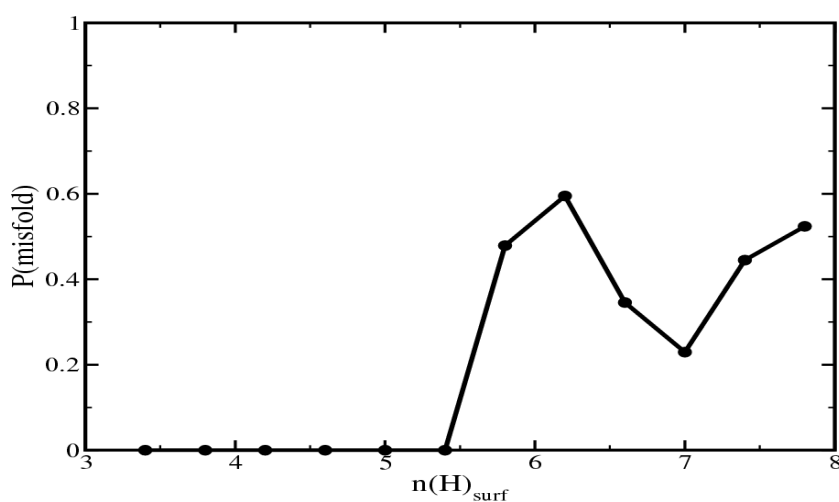

Figure S2. Probability of misfolding ( $P(\text{misfold})$ ) of the mutated sequences is plotted against  $nH_{surf}$  for protein 2PM1.

## Figure S3

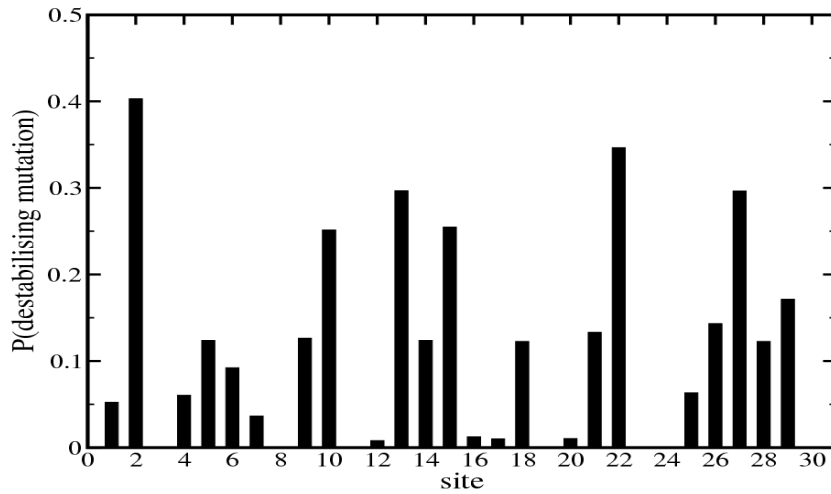

**Figure S3.** Probability of destabilizing mutations ( $P(\text{dm})$ ) is plotted against the corresponding mutated site for protein 2PM1.

The core sites are 2, 4, 5, 8, 9, 13, 14, 15, 18, 19, 26, 27, 28, 29, 30

The surface sites are 1, 3, 6, 7, 10, 11, 12, 16, 17, 20, 21, 22, 23, 24, 25

sites 2(core), 13(core), 22(surface), 27(core) have the most destabilizing effect upon mutation.

8 out of 15 surface sites (3, 11, 12, 16, 17, 20, 23, 24) have minimal destabilizing effect upon mutation.

2 out of 15 core sites (8, 19) have minimal destabilizing effect upon mutation.

# Figure S4

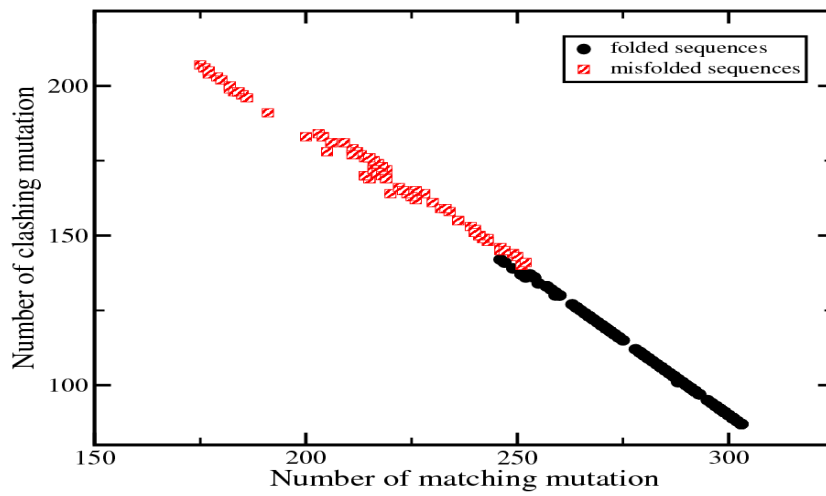

Figure S4. Number of clashing mutation is plotted against the number of matching mutation for folded and misfolded sequences.
